# Supplementary material
Source: publisher figshare collection journal article supplement (https://gsajournals.figshare.com/ndownloader/files/23187041)
Supplement: Supplementary file 1 [file 23187041]

| **Sample Name** | **Genome  Size** | **Location** | **Coordinates** |
| --- | --- | --- | --- |
| *Bembidion* sp. nr. *transversale* |  |  |  |
| Female |  |  |  |
| Bh F1 | 2190.61 | USA: Oregon: Corvallis | 44.5478 N 123.2430 W |
| Bh F2 | 2190.54 | USA: Oregon: Corvallis | 44.5478 N 123.2430 W |
| Bh F3 | 2217.67 | USA: Oregon: Corvallis | 44.5478 N 123.2430 W |
| Bh F4 | 2138.03 | USA: Oregon: Corvallis | 44.5478 N 123.2430 W |
| Bh F5 | 2208.21 | USA: Oregon: Corvallis | 44.5478 N 123.2430 W |
| Bh F6 | 2186.22 | USA: Oregon: Corvallis | 44.5478 N 123.2430 W |
| Bh F7 | 2228.84 | USA: Oregon: Corvallis | 44.5478 N 123.2430 W |
| Bh F8 | 2212.52 | USA: Oregon: Corvallis | 44.5478 N 123.2430 W |
| Bh F9 | 2168.05 | USA: Oregon: Corvallis | 44.5478 N 123.2430 W |
|  |  |  |  |
| Male |  |  |  |
| Bh M1 | 2103.53 | USA: Oregon: Corvallis | 44.5478 N 123.2430 W |
| Bh M2 | 2139.31 | USA: Oregon: Corvallis | 44.5478 N 123.2430 W |
| Bh M3 | 2115.7 | USA: Oregon: Corvallis | 44.5478 N 123.2430 W |
| Bh M4 | 2092.72 | USA: Oregon: Corvallis | 44.5478 N 123.2430 W |
| Bh M5 | 2183.69 | USA: Oregon: Corvallis | 44.5478 N 123.2430 W |
| Bh M6 | 2124.72 | USA: Oregon: Corvallis | 44.5478 N 123.2430 W |
| Bh M7 | 2116.35 | USA: Oregon: Corvallis | 44.5478 N 123.2430 W |
| Bh M8 | 2097.83 | USA: Oregon: Corvallis | 44.5478 N 123.2430 W |
| Bh M9 | 2088.64 | USA: Oregon: Corvallis | 44.5478 N 123.2430 W |
|  |  |  |  |
| *Lionepha* *tuulukwa* |  |  |  |
| Female |  |  |  |
| DRM V101282 | 597.6 | USA: Oregon: Marys Peak | 44.4748 N 123.5280 W |
|  |  |  |  |
| Male |  |  |  |
| DRMV101276 | 584.62 | USA: Oregon: Marys Peak | 44.4748 N 123.5280 W |
| DRMV101277 | 589.53 | USA: Oregon: Marys Peak | 44.4748 N 123.5280 W |
| DRMV101278 | 593.98 | USA: Oregon: Marys Peak | 44.4748 N 123.5280 W |
| DRMV101279 | 581.06 | USA: Oregon: Marys Peak | 44.4748 N 123.5280 W |
| DRMV101280 | 579.33 | USA: Oregon: Marys Peak | 44.4748 N 123.5280 W |
|  |  |  |  |
| *Bembidion lividulum* |  |  |  |
| Female |  |  |  |
| DRMV101289 | 837.39 | USA: Oregon: Creek nr Todd Lake | 44.0281 N 121.6711 W |
|  |  |  |  |
| Male |  |  |  |
| DRMV101284 | 835.03 | USA: Oregon: Creek nr Todd Lake | 44.0281 N 121.6711 W |
| DRMV101285 | 828.91 | USA: Oregon: Creek nr Todd Lake | 44.0281 N 121.6711 W |
| DRMV101286 | 822.42 | USA: Oregon: Creek nr Todd Lake | 44.0281 N 121.6711 W |
| DRMV101287 | 830.03 | USA: Oregon: Creek nr Todd Lake | 44.0281 N 121.6711 W |
| DRMV101288 | 842.09 | USA: Oregon: Creek nr Todd Lake | 44.0281 N 121.6711 W |
|  |  |  |  |
| *Pterostichus melanarius* |  |  |  |
| Female |  |  |  |
| Pm F2 | 1045.1 | USA: Oregon: Chip Ross Park | 44.6089 N 123.2813 W |
| Pm F3 | 1018.3 | USA: Oregon: Chip Ross Park | 44.6089 N 123.2813 W |
| Pm F4 | 1068 | USA: Oregon: Chip Ross Park | 44.6089 N 123.2813 W |
| Pm F5 | 1031.2 | USA: Oregon: Chip Ross Park | 44.6089 N 123.2813 W |
|  |  |  |  |
| Male |  |  |  |
| *Pterostichus melanarius* JMP059a | 982.1 | USA: Oregon: Chip Ross Park | 44.6089 N 123.2813 W |
| *Pterostichus melanarius* JMP060a | 982.1 | USA: Oregon: Chip Ross Park | 44.6089 N 123.2813 W |
| *Pterostichus melanarius* JMP061a | 1014.7 | USA: Oregon: Chip Ross Park | 44.6089 N 123.2813 W |
| *Pterostichus melanarius* JMP062a | 1024.8 | USA: Oregon: Chip Ross Park | 44.6089 N 123.2813 W |
|  |  |  |  |
| *Chlaenius sericeus* |  |  |  |
| Female |  |  |  |
| Cs F5 | 399.9 | USA: Oregon: Prineville Reservoir | 44.1294 N 120.6971 W |
| Cs F6 | 414.1 | USA: Oregon: Prineville Reservoir | 44.1294 N 120.6971 W |
| Cs F7 | 432.1 | USA: Oregon: Prineville Reservoir | 44.1294 N 120.6971 W |
| Cs F8 | 409.3 | USA: Oregon: Prineville Reservoir | 44.1294 N 120.6971 W |
| Cs F9 | 394.4 | USA: Oregon: Prineville Reservoir | 44.1294 N 120.6971 W |
| Cs F10 | 400.4 | USA: Oregon: Prineville Reservoir | 44.1294 N 120.6971 W |
|  |  |  |  |
| Male |  |  |  |
| *Chlaenius sericeus* JMP068a | 385.81 | USA: Oregon: Prineville Reservoir | 44.1294 N 120.6971 W |
| *Chlaenius sericeus* JMP069a | 390.05 | USA: Oregon: Prineville Reservoir | 44.1294 N 120.6971 W |
| *Chlaenius sericeus* JMP070a | 396.53 | USA: Oregon: Prineville Reservoir | 44.1294 N 120.6971 W |
| *Chlaenius sericeus* JMP071a | 393.6 | USA: Oregon: Prineville Reservoir | 44.1294 N 120.6971 W |

Table S2. Flow Cytometry values for specimens examined. Each value is the average of two technical replicates. Samples labeled with an asterisk were also analyzed by sequence-based methods.

a. Specimen also assessed with sequenced-based methods.
